# Supplementary material
Source: publisher figshare collection journal article supplement (https://acs.figshare.com/ndownloader/files/25922929)
Supplement: Supplementary file 1 [file 25922929]

Supporting Information

**Investigation for thermoelectric properties of MoS<sub>2</sub> monolayer-graphene heterostructure: density functional theory calculations and electrical transport measurements**

Sujee Kim <sup>†, #</sup> Changhoon Lee <sup>‡, †, #</sup> Young Soo Lim <sup>\*, †</sup> and Ji-Hoon Shim <sup>\*, †, ‡, †</sup>

<sup>†</sup> Division of Advanced Nuclear Engineering, Pohang University of Science and Technology, Pohang, 37673, Korea

<sup>‡</sup> Department of Chemistry, Pohang University of Science and Technology, Pohang, 37673, Korea

<sup>§</sup> Max Planck POSTECH Center for Complex Phase of Materials, Pohang University of Science and Technology, Pohang, 37673, Korea

<sup>||</sup> Division of Advanced Materials Science, Pohang University of Science and Technology, Pohang, 37673, Korea

<sup>⊥</sup> Department of Materials System Engineering, Pukyong National University, Busan 48547, Korea

# S. Kim and C. Lee have contributed equally to this work

**S1) The relative energy as a function of distance between MoS<sub>2</sub> and graphene layer in MoS<sub>2</sub>-graphene heterostructure.**

In this work, the distance between MoS<sub>2</sub> and graphene layer is 3.3 Å. As shown in figure S1, although 3.35 Å is the equilibrium distance between MoS<sub>2</sub> and graphene layer, the relative energy at distance 3.3 Å and 3.35 Å is smaller than 1meV. So the distance, 3.3 Å, is also reasonable value.

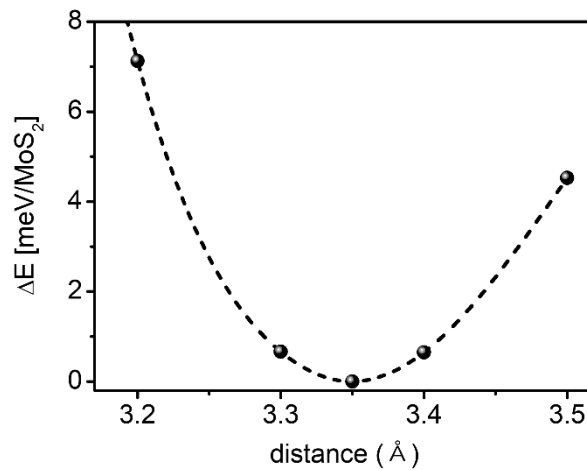

**Figure S1:** The calculated relative energy  $\Delta E$  per formula energy of MoS<sub>2</sub> as a function of distance between MoS<sub>2</sub> and graphene layer with vdW+DFT, taking the origin at the lowest energy configuration.
